# Supplementary figures and images for: Isospora and Lankesterella Parasites (Eimeriidae, Apicomplexa) of Passeriform Birds in Europe: Infection Rates, Phylogeny, and Pathogenicity
Source: MDPI journal article supplement (doi:10.3390/pathogens13040337), 2024-04-18

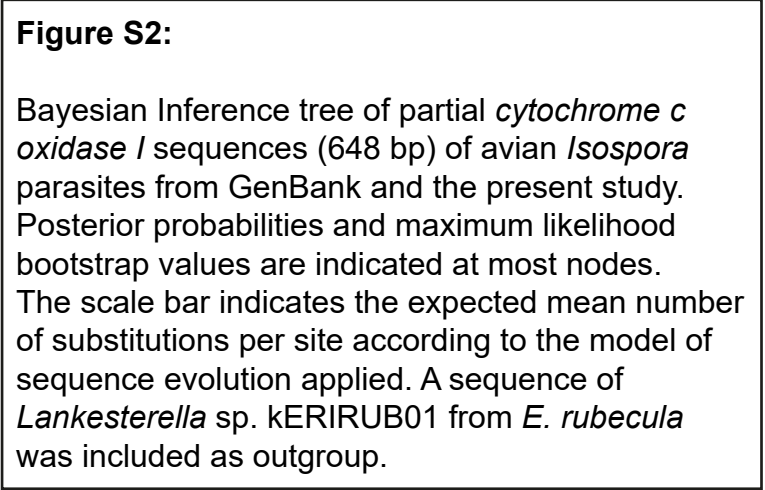

Supplement: s1 [file s1]
